# Supplementary material for: Optimal cut-off value of elevated cardiac troponin concentrations for myocardial injury predicts clinical outcomes in adult patients with COVID-19: a dose–response analysis protocol for systematic review
Source: PubMed Central journal article supplement — BMJ Open. 2021 Jan 8;11(1):e046575. doi: 10.1136/bmjopen-2020-046575 (PMC7798426; doi:10.1136/bmjopen-2020-046575), 2021-01-08
Supplement: bmjopen-2020-046575.draft_revisions.pdf [file bmjopen-2020-046575.draft_revisions.pdf]

# BMJ Open

BMJ Open is committed to open peer review. As part of this commitment we make the peer review history of every article we publish publicly available.

When an article is published we post the peer reviewers' comments and the authors' responses online. We also post the versions of the paper that were used during peer review. These are the versions that the peer review comments apply to.

The versions of the paper that follow are the versions that were submitted during the peer review process. They are not the versions of record or the final published versions. They should not be cited or distributed as the published version of this manuscript.

BMJ Open is an open access journal and the full, final, typeset and author-corrected version of record of the manuscript is available on our site with no access controls, subscription charges or pay-per-view fees (<http://bmjopen.bmj.com>).

If you have any questions on BMJ Open's open peer review process please email [info.bmjopen@bmj.com](mailto:info.bmjopen@bmj.com)

# BMJ Open

## Optimal Cutoff Value of Elevated Cardiac Troponin Level for Myocardial Injury Predicts Clinical Outcomes in Adult Patients with COVID-19: A Dose-response Analysis Protocol for Systematic Review

|                               |                                                                                                                                                                                                                                                                                                                                                                                                                                                                                                                                                                                                                                                                                                                                                                                       |
|-------------------------------|---------------------------------------------------------------------------------------------------------------------------------------------------------------------------------------------------------------------------------------------------------------------------------------------------------------------------------------------------------------------------------------------------------------------------------------------------------------------------------------------------------------------------------------------------------------------------------------------------------------------------------------------------------------------------------------------------------------------------------------------------------------------------------------|
| Journal:                      | <i>BMJ Open</i>                                                                                                                                                                                                                                                                                                                                                                                                                                                                                                                                                                                                                                                                                                                                                                       |
| Manuscript ID                 | bmjopen-2020-046575                                                                                                                                                                                                                                                                                                                                                                                                                                                                                                                                                                                                                                                                                                                                                                   |
| Article Type:                 | Protocol                                                                                                                                                                                                                                                                                                                                                                                                                                                                                                                                                                                                                                                                                                                                                                              |
| Date Submitted by the Author: | 03-Nov-2020                                                                                                                                                                                                                                                                                                                                                                                                                                                                                                                                                                                                                                                                                                                                                                           |
| Complete List of Authors:     | Zhou, Chenghui; Fuwai Hospital State Key Laboratory of Cardiovascular Disease, Anesthesiology<br>Pei, Hanjun; First Affiliated Hospital of Baotou Medical College, Cardiology<br>Gao, Yiming; Fuwai Hospital State Key Laboratory of Cardiovascular Disease, Echocardiology<br>Zhang, Yulin; Chinese Academy of Medical Sciences and Peking Union Medical College Fuwai Hospital<br>Cao, Liang; Fuwai Hospital State Key Laboratory of Cardiovascular Disease, Anesthesiology<br>Fang, Zhongrong; Fuwai Hospital State Key Laboratory of Cardiovascular Disease, Anesthesiology<br>Song, Jiangping; State Key Laboratory of Cardiovascular Disease, Fuwai Hospital, National Center for Cardiovascular Diseases, Chinese Academy of Medical Sciences and Peking Union Medical College |
| Keywords:                     | Adult intensive & critical care < ANAESTHETICS, Adult cardiology < CARDIOLOGY, Myocardial infarction < CARDIOLOGY, COVID-19                                                                                                                                                                                                                                                                                                                                                                                                                                                                                                                                                                                                                                                           |
|                               |                                                                                                                                                                                                                                                                                                                                                                                                                                                                                                                                                                                                                                                                                                                                                                                       |

SCHOLARONE™  
Manuscripts

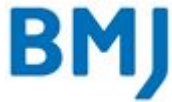

I, the Submitting Author has the right to grant and does grant on behalf of all authors of the Work (as defined in the below author licence), an exclusive licence and/or a non-exclusive licence for contributions from authors who are: i) UK Crown employees; ii) where BMJ has agreed a CC-BY licence shall apply, and/or iii) in accordance with the terms applicable for US Federal Government officers or employees acting as part of their official duties; on a worldwide, perpetual, irrevocable, royalty-free basis to BMJ Publishing Group Ltd ("BMJ") its licensees and where the relevant Journal is co-owned by BMJ to the co-owners of the Journal, to publish the Work in this journal and any other BMJ products and to exploit all rights, as set out in our [licence](#).

The Submitting Author accepts and understands that any supply made under these terms is made by BMJ to the Submitting Author unless you are acting as an employee on behalf of your employer or a postgraduate student of an affiliated institution which is paying any applicable article publishing charge ("APC") for Open Access articles. Where the Submitting Author wishes to make the Work available on an Open Access basis (and intends to pay the relevant APC), the terms of reuse of such Open Access shall be governed by a Creative Commons licence – details of these licences and which [Creative Commons](#) licence will apply to this Work are set out in our licence referred to above.

Other than as permitted in any relevant BMJ Author's Self Archiving Policies, I confirm this Work has not been accepted for publication elsewhere, is not being considered for publication elsewhere and does not duplicate material already published. I confirm all authors consent to publication of this Work and authorise the granting of this licence.

1  
2  
3  
4 **Optimal Cutoff Value of Elevated Cardiac Troponin Level for**  
5  
6 **Myocardial Injury Predicts Clinical Outcomes in Adult Patients with**  
7  
8 **COVID-19: A Dose-response Analysis Protocol for Systematic**  
9  
10  
11  
12 **Review**

13  
14 Chenghui Zhou<sup>#,\*,1</sup>, M.D, Ph.D; Hanjun Pei<sup>#,2</sup>, M.D,Ph.D; Yiming Gao<sup>3</sup>, M.D,Ph.D; Yulin  
15 Zhang<sup>1</sup>, M.D, Ph.D; Liang Cao<sup>1</sup>, M.D; Zhongrong Fang<sup>1</sup>, M.D, Ph.D; Jiangping Song<sup>\*,4</sup>, M.D,  
16 Ph.D  
17

18  
19  
20 <sup>1</sup>Department of Anesthesiology, State Key Laboratory of Cardiovascular Disease, Fuwai Hospital, National Center  
21 for Cardiovascular Disease, Chinese Academy of Medical Sciences and Peking Union Medical College, Beijing,  
22 100037, China  
23

24 <sup>2</sup> Department of Cardiology, The First Affiliated Hospital of Baotou Medical College, Baotou, Inner Mongolia,  
25 China  
26

27 <sup>3</sup>Department of Echocardiography, State Key Laboratory of Cardiovascular Disease, Fuwai Hospital, National  
28 Center for Cardiovascular Diseases, Chinese Academy of Medical Sciences & Peking Union Medical College,  
29 China  
30

31 <sup>4</sup>Department of Cardiac Surgery, State Key Laboratory of Cardiovascular Disease, Fuwai Hospital, National  
32 Center for Cardiovascular Disease, Chinese Academy of Medical Sciences and Peking Union Medical College,  
33 Beijing, 100037, China  
34

35  
36  
37 <sup>#</sup>Dr. Zhou and Dr. Pei contributed equally as the first authors in this work.  
38

39 **\*Address for Correspondence:** Chenghui Zhou and Jiangping Song;  
40

41  
42 No. 167 Beilishi Road, 100037 Xicheng District, Beijing, China  
43

44  
45 Tel: 86-10-88398082, Fax: 86-10-88398082  
46

47  
48 E-mail: chenghuizhou@yahoo.com (Zhou Ch); fwsongjiangping@126.com (Song Jp);  
49  
50

51  
52  
53 **Word Count:** 3219 words.  
54  
55  
56  
57  
58  
59  
60

## ABSTRACT

**Introduction** Acute myocardial injury (AMI) in patients with COVID-19 infection has been recognized as one important complication associating with in-hospital mortality.

The potential dose response effect of cardiac troponin (cTn) levels on adverse clinical outcomes has not been systematically studied. Hence, we will conduct a comprehensive dose-response meta-analysis to quantitatively evaluate the association between the elevated cTn levels and in-hospital adverse clinical outcomes in COVID-19 patients.

**Methods** We will search PubMed, EMBase, Cochrane Library, and ISI Knowledge via Web of Science database (from inception until October, 2021) to identify all retrospective, prospective cohort, and randomized controlled studies using the related keywords. The primary outcome will be all-cause mortality during hospitalization. The second outcome will be major adverse cardiovascular event (MACE). To conduct a dose-response meta-analysis for the potential linear or restricted cubic spline regression relationship between elevated cTn levels and all-cause mortality or MACE, studies with three or more categories of cTn levels will be included. Univariate or multivariate meta-regression and subgroup analyses will be conducted for the comparison between elevated versus non-elevated categories of cTn level. Sensitivity analyses were used to assess the robustness of our results by removing each included study at one time to obtain and evaluate the remaining overall estimates of all-cause mortality or MACE.

1  
2  
3  
4 **Ethics and dissemination** In accordance with the Institutional Review Board  
5  
6  
7 /Independent Ethics Committee of Fuwai Hospital, the ethical approval is waived for  
8  
9 the protocol of systematic review. This meta-analysis will be disseminated through a  
10  
11  
12 peer-reviewing process for journal publication and conference communication.  
13

14  
15 **Keywords:** Acute myocardial injury, COVID-19, cardiac troponin, dose-response,  
16  
17 meta-analysis  
18

19  
20 **PROSPERO registration number** CRD42020216059  
21  
22  
23  
24  
25  
26  
27  
28  
29  
30  
31  
32  
33  
34  
35  
36  
37  
38  
39  
40  
41  
42  
43  
44  
45  
46  
47  
48  
49  
50  
51  
52  
53  
54  
55  
56  
57  
58  
59  
60

## Strengths and limitations of this study

1. This systematic review and meta-analysis will be the first one to comprehensively explore a potential linear or nonlinear dose-response relationship between cTn level and adverse clinical outcomes in COVID-19.
2. This protocol will encourage more and more researchers focusing on this issue and publishing the related prognostic outcome for different categories ( $>2$ ) of cTn levels in COVID-19.
3. High sensitive cTn measurements at different time points are suggested for the potential prognostic role of tiny AMI (cTn levels between detection limit and URL) in early diagnosis for risk stratification, prompt therapy initiation, and thereby improving prognosis in patients with COVID-19 infection.
4. Both the retrospective and prospective study design will be included resulting the potential bias.
5. The sample size in each study may be small for the limitation of medical resources and economic decline.

## Introduction

Acute myocardial injury (AMI) has been recognized as one important complication in adult patients with COVID-19 infection associating with in-hospital morbidity and mortality<sup>1 2</sup>. By Oct 31st 2020, COVID-19 pandemic has cause 46,501,423 infections and 1,202,031 deaths worldwide in 215 countries<sup>3</sup>.

Some studies have showed that the incidence of AMI is common as many as 20~40% based on cardiac troponin (cTn) levels, particularly in patients with obvious cardiovascular risk factors and severity of COVID-19. Although the main target of COVID-19 is the respiratory system, the cardiovascular system could also be influenced by affecting the neurohumoral regulation of the cardiovascular system, unbalancing the myocardial oxygen supply and demand with lung injury associated hypoxia, acute systemic inflammatory reaction and cytokine storm<sup>4</sup>.

Up to now, different diagnostic thresholds of cTn levels for AMI in COVID-19 patients have been proposed. Some studies did not use 1xURL as the cutoff value of cTn levels<sup>5</sup>. Moreover, controversial prognostic relationships of AMI have been published by different researches using 1xURL for AMI diagnosis<sup>6 7</sup>. Additionally, COVID-19 is a newly-breakout global pandemic with high mortality (at least 4 times increase), and will have a long-term coexistence with human beings<sup>8</sup>. Accordingly, the optimal cutoff value of cTn level for AMI with prognostic relevance needs to be identified in the very near future. However, there have been limited studies reporting the clinical outcomes for different categories of cTn levels in COVID-19. Hence, we



1  
2  
3  
4 will conduct a comprehensive dose-response meta-analysis to quantitatively evaluate  
5  
6 the association between the elevated cTn levels and adverse clinical outcomes in  
7  
8 patients with COVID-19. We believe this protocol will encourage more and more  
9  
10 researchers focusing on this issue and publishing the related prognostic outcome for  
11  
12 different categories (>2) of cTn levels in COVID-19.  
13  
14  
15  
16  
17  
18  
19

## 20 **Objectives**

21  
22  
23 The purpose of this systematic review and meta-analysis is to explore the  
24  
25 potential optimal cutoff value of elevated cardiac troponin level for myocardial injury  
26  
27 predicting clinical outcomes in adult patients with COVID-19.  
28  
29  
30  
31  
32  
33

## 34 **METHODS AND ANALYSIS**

### 35 **Search Strategy**

36  
37  
38  
39 We will report this meta-analysis following the Preferred Reporting Items for  
40  
41 Systematic Reviews and Meta-Analyses Protocols (PRISMA-P) guideline<sup>9</sup>. PubMed,  
42  
43 EMBase, Cochrane Library, and ISI Knowledge via Web of Science database (from  
44  
45 inception until October, 2021) will be systematically searched. Table 1 shows the  
46  
47 related search keywords. Figure 1 shows the flow chart of searching process. This  
48  
49 meta-analysis has been registered in the PROSPERO (CRD42020216059).  
50  
51  
52  
53  
54  
55  
56  
57  
58  
59  
60

### **Type of Participants**

We will include adult patients with confirmed COVID-19 infection as study participants.

### **Type of Studies**

We will include all the retrospective, prospective cohort, or randomized controlled studies that have reported the associations of different cardiac troponin levels ( $>2$ ) with the incidence of major adverse clinical outcomes. English-published trials will be included. The studies unable to extract odds ratio (OR) or hazard ratio (HR) and the corresponding 95% confidence intervals (CI) will be excluded.

### **Type of Outcomes**

The primary outcome will be all-cause mortality during hospitalization. The second outcome will be major adverse cardiovascular event (MACE). MACE is a combined endpoint during hospitalization including: all-cause death, myocardial infarction, congestive heart failure, acute renal failure, pulmonary embolism, or stroke.

### **Data Extraction**

Data will be extracted by two independent authors (Y.Gao and Y.Zhang). A third author (H. Pei) will make a final decision in case of discrepancies. The extracted data

1  
2  
3  
4 included study design (author, publication year, country, sample size, percentage of  
5  
6 positive cTn levels), patient characteristics (mean age, male proportion, race, body  
7  
8 mass index, diabetes proportion, hypertension proportion, hyperlipidemia proportion,  
9  
10 smoking proportion, coronary artery disease proportion, previous myocardial  
11  
12 infarction, chronic heart failure, history of atrial fibrillation,, history of stroke or  
13  
14 transient ischemic accident, kidney dysfunction, history of lung disease, history of  
15  
16 liver disease,, beta-blocker usage, statin usage, angiotensin-converting enzyme  
17  
18 inhibitor[ACEI] usage, angiotensin receptor blocker[ARB] usage, calcium channel  
19  
20 blocker usage, aspirin usage), follow-up period, detection kit of cTn, URL of cTn,  
21  
22 detection limit of cTn, cutoff value of cTn, and the different categories for cTn level.  
23  
24  
25  
26  
27  
28  
29  
30  
31  
32  
33

### 34 **Assessment of Risk of Bias**

35  
36  
37 Newcastle-Ottawa quality assessment scale (NOS) will be used to evaluate the  
38  
39 methodological quality of included studies<sup>10</sup>.  
40  
41  
42  
43  
44

### 45 **Data synthesis**

46  
47 The ORs or HRs in each study will be extracted from the elevated versus  
48  
49 non-elevated categories of cTn level for the pooled analysis. For studies only  
50  
51 providing the Log-rank test or the Kaplan-Meier survival curve, the HR will be  
52  
53 calculated based on time-to-event aggregate data<sup>11</sup>. The referent category with  
54  
55 nonelevated cTn will be the lowest cTn level in each study. Random-effect model will  
56  
57  
58  
59  
60

1  
2  
3  
4 be used for the potential clinical inconsistency among the included studies in the  
5  
6  
7 pooled analysis by the DerSimonian and Laird method. If one study reported multiple  
8  
9  
10 categories (>2 categories), we will calculate the OR based on the number of cases and  
11  
12 non-cases in all of the elevated categories and referent groups for the high vs low  
13  
14 analysis. Univariate or multivariate meta-regression and subgroup analyses will be  
15  
16  
17 conducted for the comparison between elevated versus non-elevated categories of cTn  
18  
19 level<sup>12</sup>. Sensitivity analyses were used to assess the robustness of our results by  
20  
21  
22 removing each included study at one time to obtain and evaluate the remaining overall  
23  
24  
25 estimates of all-cause mortality or MACE. Publication bias evaluation will be  
26  
27  
28 conducted by the Begg's, Egger's test, and visualized symmetry of the funnel plot. A  
29  
30  
31 dose-response meta-analysis for the potential linear or restricted cubic spline  
32  
33  
34 regression relationship between different categorized elevated cTn levels and  
35  
36  
37 all-cause mortality or MACE will be performed. For study only providing the  
38  
39  
40 numerical value of each category of elevated cTn level, the related number of times  
41  
42  
43 the corresponding URL in each study will be calculated. The average level of elevated  
44  
45  
46 cTn in each category will be estimated by the mean of the lower and upper levels. If  
47  
48  
49 the highest category has an open upper level, the mean level will be estimated to be  
50  
51  
52 1.2x the lower levels<sup>13</sup>.  $P < 0.05$  (2-sided) will be considered to be statistically  
53  
54  
55 significant. All statistical analyses will be performed in Stata software (version 10.0,  
56  
57  
58 StataCorp., College Station, TX, USA) and RevMan software (version 5.0, Cochrane  
59  
60  
61 Collaboration, Oxford, United Kingdom).

## DISCUSSION

Although the Fourth Universal Definition of Myocardial Infarction (UDMI) defines AMI as cTn concentrations >99th percentile URL under a broad clinical condition<sup>14</sup>, some studies have used thresholds other than the URL<sup>5</sup>, whereas others using URL have obtained negative findings in patients with COVID-19<sup>6</sup>. Additionally, many studies have not used high sensitive cTn assays and only measured once at early time point, resulting in the underestimated incidence and extent of AMI in COVID-19.

Recently, a meta-analysis has indicated that the COVID-19 patients with AMI (mostly using URL as cutoff) showed a near 4 times higher mortality risk than those with non-AMI<sup>8</sup>. High mortality as high as 80 times with AMI has been reported in early univariate regression analysis<sup>1</sup>. Therefore, an optimal cutoff value of cTn levels for AMI need to be explored for early risk stratification, prompt therapy initiation, and thereby improving prognosis<sup>15</sup>. Similar findings have been showed by our previous analysis that a lower cutoff value of cTn levels for AMI than in fourth UDMI was proposed with prognostic relevance following elective percutaneous coronary intervention<sup>16</sup>. Fortunately, there has been several studies concerning this important issue<sup>17-19</sup>. In this protocol, we make an appeal for the future studies to release the related prognostic outcomes with different categories of cTn levels (>2) in patients with COVID-19. What's more, high sensitive cTn measurements at different time points<sup>20</sup> are encouraged for the potential prognostic role of tiny AMI

1  
2  
3  
4 (cTn levels between detection limit and URL) in patients with COVID-19  
5  
6 infection<sup>21-24</sup> .  
7  
8

9 The major strength of this systematic review and meta-analysis is, for the first  
10 time, to comprehensively explore a potential linear or nonlinear dose-response  
11 relationship between cTn level and adverse clinical outcomes in COVID-19.  
12 Moreover, the significance of subclinical or tiny AMI below URL level will be  
13 focused for early diagnosis to improve prognosis and reduce the related mortality<sup>21</sup>.  
14 We believe this protocol will encourage more and more researchers focusing on this  
15 issue and publishing the related prognostic outcome for different categories (>2) of  
16 cTn levels in COVID-19. In addition, we will try to provide some new evidence for  
17 the new diagnostic criterion of the COVID-19 related AMI for a long-term  
18 coexistence of COVID-19 with human beings has been proposed. The limitations, on  
19 the other hand, are also existed in our analysis. Firstly, both the retrospective and  
20 prospective study design will be included resulting the potential bias. Secondly, the  
21 sample size in each study may be small for the limitation of medical resources and  
22 economic decline. Thirdly, we could not rule out the potential influence of different  
23 types of detection kit and method for the cTn level in the included studies. Fourthly,  
24 our analysis may not be sufficient for a diagnosis of myocardial infarction for lacking  
25 additional evidence of myocardial ischemia (electrocardiography, echocardiography,  
26 coronary CT or angiography) in accordance with the fourth UDMI definition.  
27  
28  
29  
30  
31  
32  
33  
34  
35  
36  
37  
38  
39  
40  
41  
42  
43  
44  
45  
46  
47  
48  
49  
50  
51  
52  
53  
54  
55  
56  
57  
58  
59  
60

## ETHICS AND DISSEMINATION

In accordance with the Institutional Review Board /Independent Ethics Committee of Fuwai Hospital, the ethical approval is waived for the protocol of systematic review.

This meta-analysis will be disseminated through a peer-reviewing process for journal publication and conference communication.

For peer review only

## Reference

1. Zhou F, Yu T, Du R, et al. Clinical course and risk factors for mortality of adult inpatients with COVID-19 in Wuhan, China: a retrospective cohort study. *Lancet* 2020;395(10229):1054-62.
2. Shi S, Qin M, Shen B, et al. Association of Cardiac Injury With Mortality in Hospitalized Patients With COVID-19 in Wuhan, China. *JAMA Cardiol* 2020;5(7):802-10.
3. Worldometersinfo. COVID-19 coronavirus outbreak. 2020 [Available from: <https://www.worldometers.info/coronavirus/.2020>].
4. Basso C, Leone O, Rizzo S, et al. Pathological features of COVID-19-associated myocardial injury: a multicentre cardiovascular pathology study. *Eur Heart J* 2020;41(39):3827-35.
5. He XW, Lai JS, Cheng J, et al. [Impact of complicated myocardial injury on the clinical outcome of severe or critically ill COVID-19 patients]. *Zhonghua Xin Xue Guan Bing Za Zhi* 2020;48(6):456-60.
6. Yang X, Yu Y, Xu J, et al. Clinical course and outcomes of critically ill patients with SARS-CoV-2 pneumonia in Wuhan, China: a single-centered, retrospective, observational study. *Lancet Respir Med* 2020;8(5):475-81.
7. Fu L, Fei J, Xiang H, et al. Influence factors of death risk among COVID-19 patients in Wuhan, China: a hospital-based case-cohort study. *medRxiv* 2020
8. Li JW, Han TW, Woodward M, et al. The impact of 2019 novel coronavirus on heart injury: A Systematic review and Meta-analysis. *Prog Cardiovasc Dis* 2020;63(4):518-24.
9. Shamseer L, Moher D, Clarke M, et al. Preferred reporting items for systematic review and meta-analysis protocols (PRISMA-P) 2015: elaboration and explanation. *BMJ* 2015;350:g7647.
10. Murad MH, Sultan S, Haffar S, et al. Methodological quality and synthesis of case series and case reports. *BMJ Evid Based Med* 2018;23(2):60-3.
11. Williamson PR, Smith CT, Hutton JL, et al. Aggregate data meta-analysis with time-to-event outcomes. *Stat Med* 2002;21(22):3337-51.
12. Higgins JP, Thompson SG. Quantifying heterogeneity in a meta-analysis. *Stat Med* 2002;21(11):1539-58.
13. Berlin JA, Longnecker MP, Greenland S. Meta-analysis of epidemiologic dose-response data. *Epidemiology* 1993;4(3):218-28.
14. Thygesen K, Alpert JS, Jaffe AS, et al. Fourth Universal Definition of Myocardial Infarction (2018). *J Am Coll Cardiol* 2018;72(18):2231-64.
15. Kozinski M, Krintus M, Kubica J, et al. High-sensitivity cardiac troponin assays: From improved analytical performance to enhanced risk stratification. *Crit Rev Clin Lab Sci* 2017;54(3):143-72.
16. Li Y, Pei H, Bulluck H, et al. Periprocedural elevated myocardial biomarkers and clinical outcomes following elective percutaneous coronary intervention: a comprehensive dose-response meta-analysis of 44,972 patients from 24 prospective studies. *EuroIntervention* 2020;15(16):1444-50.
17. Chen T, Wu D, Chen H, et al. Clinical characteristics of 113 deceased patients with coronavirus disease 2019: retrospective study. *BMJ* 2020;368:m1091.
18. Lala A, Johnson KW, Januzzi JL, et al. Prevalence and Impact of Myocardial Injury in Patients Hospitalized With COVID-19 Infection. *J Am Coll Cardiol* 2020;76(5):533-46.



- 1  
2  
3 19. Hui H, Zhang Y, Yang X, et al. Clinical and radiographic features of cardiac injury in patients with  
4 2019 novel coronavirus pneumonia. *medRxiv* 2020. (accessed ).  
5  
6 20. Schiavone M, Gasperetti A, Mancone M, et al. Redefining the Prognostic Value of High-Sensitivity  
7 Troponin in COVID-19 Patients: The Importance of Concomitant Coronary Artery Disease. *J Clin Med*  
8 2020;9(10)  
9  
10 21. Cho SW. Subclinical and Tiny Myocardial Injury within Upper Reference Limit of Cardiac Troponin  
11 Should Not Be Ignored after Noncardiac Surgery. *Korean Circ J* 2020;50(10):938-9.  
12  
13 22. Park J, Hyeon CW, Lee SH, et al. Mildly Elevated Cardiac Troponin below the 99th-Percentile Upper  
14 Reference Limit after Noncardiac Surgery. *Korean Circ J* 2020;50(10):925-37.  
15  
16 23. Park J, Hyeon CW, Lee SH, et al. Preoperative cardiac troponin below the 99th-percentile upper  
17 reference limit and 30-day mortality after noncardiac surgery. *Sci Rep* 2020;10(1):17007.  
18  
19 24. Mullins KE, Christenson RH. Optimal Detection of Acute Myocardial Injury and Infarction with  
20 Cardiac Troponin: Beyond the 99th Percentile, into the High-Sensitivity Era. *Curr Cardiol Rep*  
21 2020;22(9):101.  
22  
23  
24  
25  
26  
27  
28  
29  
30  
31  
32  
33  
34  
35  
36  
37  
38  
39  
40  
41  
42  
43  
44  
45  
46  
47  
48  
49  
50  
51  
52  
53  
54  
55  
56  
57  
58  
59  
60

1  
2  
3  
4  
5  
6  
7 **Author Contributions** CZ, HP, and JS contributed to the conception and design of  
8  
9 the study, and revision of the protocol. The manuscript of the protocol was drafted by  
10  
11 CZ. YG and YZ will independently search and select the eligible studies and extract  
12  
13 the data from the included studies. LC and ZF will assess methodological quality and  
14  
15 the risk of bias. All the authors approved the protocol publication.  
16  
17  
18  
19  
20  
21  
22

23 **Funding** This work was supported by the CAMS Initiative for Innovative Medicine  
24  
25 (020-I2M-CoV19-003), and the National Natural Science Foundation of China (No.  
26  
27 81970290).  
28  
29  
30  
31  
32  
33

34 **Competing interests** None declared.  
35  
36  
37  
38

39 **Patient and public involvement** Patients and/or the public were not involved in  
40  
41 the design, or conduct, or reporting or dissemination plans of this research.  
42  
43  
44  
45  
46  
47

48 **Patient consent for publication** Not required.  
49  
50  
51  
52

53 **Provenance and peer review** Not commissioned; externally peer reviewed.  
54  
55  
56  
57  
58  
59  
60

1  
2  
3  
4  
5  
6  
7  
8  
9  
10  
11  
12  
13  
14  
15  
16  
17  
18  
19  
20  
21  
22  
23  
24  
25  
26  
27  
28  
29  
30  
31  
32  
33  
34  
35  
36  
37  
38  
39  
40  
41  
42  
43  
44  
45  
46  
47  
48  
49  
50  
51  
52  
53  
54  
55  
56  
57  
58  
59  
60

## Figure Legends

**Figure 1.** Trial Searching and Selecting Flow Chart.

For peer review only

**Table 1 Search strategy for PubMed, EMBase, Cochrane Library, and ISI Knowledge via Web of Science Database**

| <b>Database</b>         | <b>Search items</b>                                                                 |
|-------------------------|-------------------------------------------------------------------------------------|
| <b>PubMed</b>           |                                                                                     |
| No.                     |                                                                                     |
| # 1                     | ((cardiac injury) OR (myocardial injury)) OR (troponin)                             |
| # 2                     | (COVID-19) OR (SARS-CoV-2)                                                          |
| # 3                     | # 1 and # 2                                                                         |
| <b>EMBase</b>           |                                                                                     |
| # 1                     | cardiac AND injury OR (myocardial AND injury) OR troponin                           |
| # 2                     | 'covid 19' OR 'sars cov 2'                                                          |
| # 3                     | # 1 and # 2                                                                         |
| <b>Cochrane Library</b> |                                                                                     |
| # 1                     | cardiac injury in All Text OR myocardial injury in All Text OR troponin in All Text |

- 
- 1 # 2 COVID-19 in All Text OR SARS-CoV-2 in All Text  
2  
3
- 4 # 3 # 1 and # 2  
5
- 6 **ISI Knowledge via**  
7  
8 **Web of Science**  
9
- 10 # 1 TOPIC: (cardiac injury) OR TOPIC: (myocardial injury) OR TOPIC: (troponin)  
11  
12 Timespan: All years. Databases: WOS, BIOSIS, KJD, MEDLINE, RSCI, SCIELO.  
13  
14  
15  
16 Search language=Auto  
17  
18
- 19 # 2 TOPIC: (COVID-19) OR TOPIC: (SARS-CoV-2)  
20  
21 Timespan: All years. Databases: WOS, BIOSIS, KJD, MEDLINE, RSCI, SCIELO.  
22  
23  
24  
25 Search language=Auto  
26
- 27 # 3 # 1 and # 2  
28  
29
-

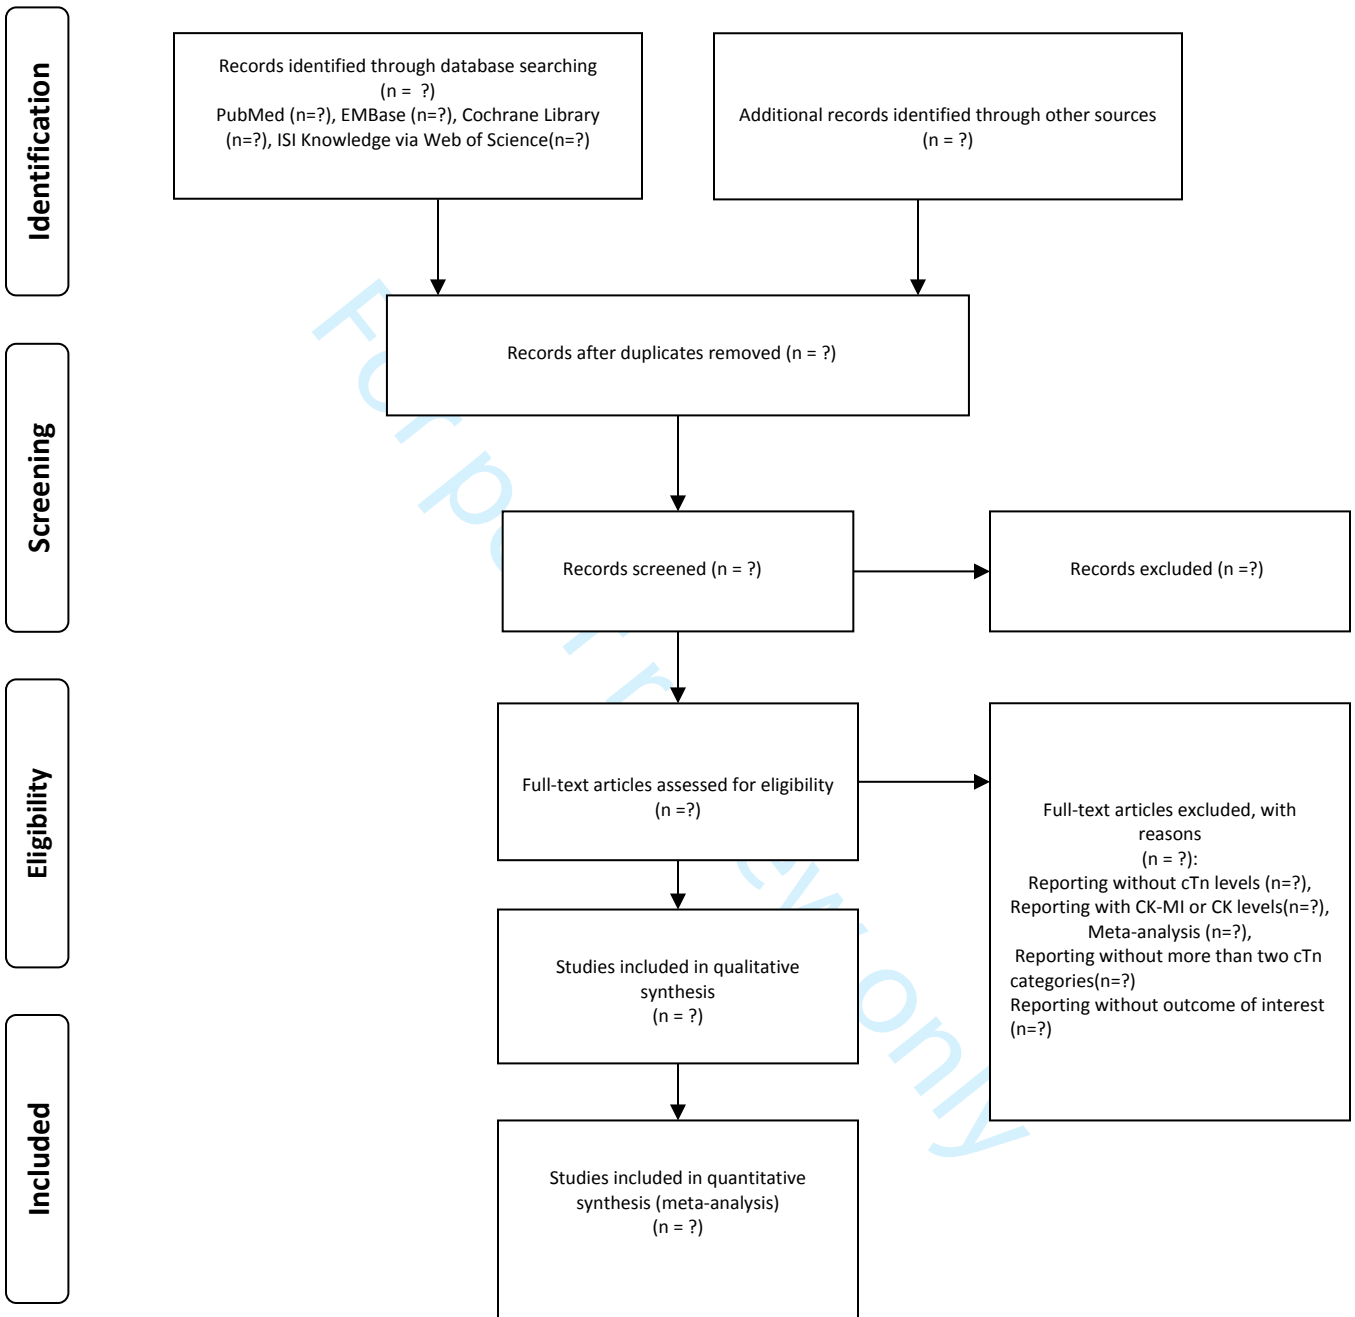

# Reporting checklist for protocol of a systematic review.

Based on the PRISMA-P guidelines.

## Instructions to authors

Complete this checklist by entering the page numbers from your manuscript where readers will find each of the items listed below.

Your article may not currently address all the items on the checklist. Please modify your text to include the missing information. If you are certain that an item does not apply, please write "n/a" and provide a short explanation.

Upload your completed checklist as an extra file when you submit to a journal.

In your methods section, say that you used the PRISMA-Preporting guidelines, and cite them as:

Moher D, Shamseer L, Clarke M, Ghersi D, Liberati A, Petticrew M, Shekelle P, Stewart LA. Preferred Reporting Items for Systematic Review and Meta-Analysis Protocols (PRISMA-P) 2015 statement. Syst Rev. 2015;4(1):1.

|                | Reporting Item                                                                                                                                                | Page Number       |
|----------------|---------------------------------------------------------------------------------------------------------------------------------------------------------------|-------------------|
| Title          |                                                                                                                                                               |                   |
| Identification | <a href="#">#1a</a> Identify the report as a protocol of a systematic review                                                                                  | 1                 |
| Update         | <a href="#">#1b</a> If the protocol is for an update of a previous systematic review, identify as such                                                        | No update         |
| Registration   |                                                                                                                                                               |                   |
|                | <a href="#">#2</a> If registered, provide the name of the registry (such as PROSPERO) and registration number                                                 | 3                 |
| Authors        |                                                                                                                                                               |                   |
| Contact        | <a href="#">#3a</a> Provide name, institutional affiliation, e-mail address of all protocol authors; provide physical mailing address of corresponding author | 1                 |
| Contribution   | <a href="#">#3b</a> Describe contributions of protocol authors and identify the guarantor of the review                                                       | 15                |
| Amendments     |                                                                                                                                                               | Not<br>Amendments |
|                | <a href="#">#4</a> If the protocol represents an amendment of a previously completed or published protocol, identify as                                       |                   |

such and list changes; otherwise, state plan for documenting important protocol amendments

### Support

|                           |                     |                                                                                                      |    |
|---------------------------|---------------------|------------------------------------------------------------------------------------------------------|----|
| Sources                   | <a href="#">#5a</a> | Indicate sources of financial or other support for the review                                        | 15 |
| Sponsor                   | <a href="#">#5b</a> | Provide name for the review funder and / or sponsor                                                  | 15 |
| Role of sponsor or funder | <a href="#">#5c</a> | Describe roles of funder(s), sponsor(s), and / or institution(s), if any, in developing the protocol | 15 |

### Introduction

|            |                    |                                                                                                                                                          |   |
|------------|--------------------|----------------------------------------------------------------------------------------------------------------------------------------------------------|---|
| Rationale  | <a href="#">#6</a> | Describe the rationale for the review in the context of what is already known                                                                            | 5 |
| Objectives | <a href="#">#7</a> | Provide an explicit statement of the question(s) the review will address with reference to participants, interventions, comparators, and outcomes (PICO) | 6 |

### Methods

|                                         |                      |                                                                                                                                                                                                                               |   |
|-----------------------------------------|----------------------|-------------------------------------------------------------------------------------------------------------------------------------------------------------------------------------------------------------------------------|---|
| Eligibility criteria                    | <a href="#">#8</a>   | Specify the study characteristics (such as PICO, study design, setting, time frame) and report characteristics (such as years considered, language, publication status) to be used as criteria for eligibility for the review | 6 |
| Information sources                     | <a href="#">#9</a>   | Describe all intended information sources (such as electronic databases, contact with study authors, trial registers or other grey literature sources) with planned dates of coverage                                         | 6 |
| Search strategy                         | <a href="#">#10</a>  | Present draft of search strategy to be used for at least one electronic database, including planned limits, such that it could be repeated                                                                                    | 6 |
| Study records - data management         | <a href="#">#11a</a> | Describe the mechanism(s) that will be used to manage records and data throughout the review                                                                                                                                  | 6 |
| Study records - selection process       | <a href="#">#11b</a> | State the process that will be used for selecting studies (such as two independent reviewers) through each phase of the review (that is, screening, eligibility and inclusion in meta-analysis)                               | 7 |
| Study records - data collection process | <a href="#">#11c</a> | Describe planned method of extracting data from reports (such as piloting forms, done independently, in duplicate), any processes for obtaining and confirming data from investigators                                        | 7 |
| Data items                              | <a href="#">#12</a>  | List and define all variables for which data will be sought (such as PICO items, funding sources), any pre-planned data assumptions and simplifications                                                                       | 7 |



|    |                     |                      |                                                                                                                                                                                |     |
|----|---------------------|----------------------|--------------------------------------------------------------------------------------------------------------------------------------------------------------------------------|-----|
| 1  | Outcomes and        | <a href="#">#13</a>  | List and define all outcomes for which data will be sought, including prioritization of main and                                                                               | 7,8 |
| 2  |                     |                      |                                                                                                                                                                                |     |
| 3  | prioritization      |                      | additional outcomes, with rationale                                                                                                                                            |     |
| 4  |                     |                      |                                                                                                                                                                                |     |
| 5  | Risk of bias in     | <a href="#">#14</a>  | Describe anticipated methods for assessing risk of bias of individual studies, including whether this                                                                          | 8   |
| 6  |                     |                      |                                                                                                                                                                                |     |
| 7  | individual studies  |                      | will be done at the outcome or study level, or both; state how this information will be used in data                                                                           |     |
| 8  |                     |                      |                                                                                                                                                                                |     |
| 9  |                     |                      | synthesis                                                                                                                                                                      |     |
| 10 |                     |                      |                                                                                                                                                                                |     |
| 11 | Data synthesis      | <a href="#">#15a</a> | Describe criteria under which study data will be quantitatively synthesised                                                                                                    | 8,9 |
| 12 |                     |                      |                                                                                                                                                                                |     |
| 13 | Data synthesis      | <a href="#">#15b</a> | If data are appropriate for quantitative synthesis, describe planned summary measures, methods of                                                                              | 8,9 |
| 14 |                     |                      | handling data and methods of combining data from studies, including any planned exploration of                                                                                 |     |
| 15 |                     |                      |                                                                                                                                                                                |     |
| 16 |                     |                      | consistency (such as I <sup>2</sup> , Kendall's T)                                                                                                                             |     |
| 17 |                     |                      |                                                                                                                                                                                |     |
| 18 | Data synthesis      | <a href="#">#15c</a> | Describe any proposed additional analyses (such as sensitivity or subgroup analyses, meta-                                                                                     | 8,9 |
| 19 |                     |                      | regression)                                                                                                                                                                    |     |
| 20 |                     |                      |                                                                                                                                                                                |     |
| 21 | Data synthesis      | <a href="#">#15d</a> | If quantitative synthesis is not appropriate, describe the type of summary planned                                                                                             | 8,9 |
| 22 |                     |                      |                                                                                                                                                                                |     |
| 23 |                     |                      |                                                                                                                                                                                |     |
| 24 |                     |                      |                                                                                                                                                                                |     |
| 25 | Data synthesis      | <a href="#">#15d</a> | If quantitative synthesis is not appropriate, describe the type of summary planned                                                                                             | 8,9 |
| 26 |                     |                      |                                                                                                                                                                                |     |
| 27 |                     |                      |                                                                                                                                                                                |     |
| 28 | Meta-bias(es)       | <a href="#">#16</a>  | Specify any planned assessment of meta-bias(es) (such as publication bias across studies,                                                                                      | 9   |
| 29 |                     |                      | selective reporting within studies)                                                                                                                                            |     |
| 30 |                     |                      |                                                                                                                                                                                |     |
| 31 |                     |                      |                                                                                                                                                                                |     |
| 32 | Confidence in       | <a href="#">#17</a>  | Describe how the strength of the body of evidence will be assessed (such as GRADE)                                                                                             | 9   |
| 33 |                     |                      |                                                                                                                                                                                |     |
| 34 | cumulative evidence |                      |                                                                                                                                                                                |     |
| 35 |                     |                      |                                                                                                                                                                                |     |
| 36 |                     |                      |                                                                                                                                                                                |     |
| 37 | None                |                      | The PRISMA-P checklist is distributed under the terms of the Creative Commons Attribution License CC-BY 4.0. This checklist can be completed                                   |     |
| 38 |                     |                      |                                                                                                                                                                                |     |
| 39 | online using        |                      | <a href="https://www.goodreports.org/">https://www.goodreports.org/</a> , a tool made by the <a href="#">EQUATOR Network</a> in collaboration with <a href="#">Penelope.ai</a> |     |
| 40 |                     |                      |                                                                                                                                                                                |     |
| 41 |                     |                      |                                                                                                                                                                                |     |
| 42 |                     |                      |                                                                                                                                                                                |     |
| 43 |                     |                      |                                                                                                                                                                                |     |
| 44 |                     |                      |                                                                                                                                                                                |     |
| 45 |                     |                      |                                                                                                                                                                                |     |
| 46 |                     |                      |                                                                                                                                                                                |     |
| 47 |                     |                      |                                                                                                                                                                                |     |
| 48 |                     |                      |                                                                                                                                                                                |     |
| 49 |                     |                      |                                                                                                                                                                                |     |
| 50 |                     |                      |                                                                                                                                                                                |     |
| 51 |                     |                      |                                                                                                                                                                                |     |
| 52 |                     |                      |                                                                                                                                                                                |     |
| 53 |                     |                      |                                                                                                                                                                                |     |
| 54 |                     |                      |                                                                                                                                                                                |     |
| 55 |                     |                      |                                                                                                                                                                                |     |
| 56 |                     |                      |                                                                                                                                                                                |     |
| 57 |                     |                      |                                                                                                                                                                                |     |
| 58 |                     |                      |                                                                                                                                                                                |     |
| 59 |                     |                      |                                                                                                                                                                                |     |
| 60 |                     |                      |                                                                                                                                                                                |     |

# BMJ Open

## Optimal Cutoff Value of Elevated Cardiac Troponin Concentrations for Myocardial Injury Predicts Clinical Outcomes in Adult Patients with COVID-19: A Dose-response Analysis Protocol for Systematic Review

|                                 |                                                                                                                                                                                                                                                                                                                                                                                                                                                                                                                                                                                                                                                                                                                                                                                       |
|---------------------------------|---------------------------------------------------------------------------------------------------------------------------------------------------------------------------------------------------------------------------------------------------------------------------------------------------------------------------------------------------------------------------------------------------------------------------------------------------------------------------------------------------------------------------------------------------------------------------------------------------------------------------------------------------------------------------------------------------------------------------------------------------------------------------------------|
| Journal:                        | <i>BMJ Open</i>                                                                                                                                                                                                                                                                                                                                                                                                                                                                                                                                                                                                                                                                                                                                                                       |
| Manuscript ID                   | bmjopen-2020-046575.R1                                                                                                                                                                                                                                                                                                                                                                                                                                                                                                                                                                                                                                                                                                                                                                |
| Article Type:                   | Protocol                                                                                                                                                                                                                                                                                                                                                                                                                                                                                                                                                                                                                                                                                                                                                                              |
| Date Submitted by the Author:   | 10-Dec-2020                                                                                                                                                                                                                                                                                                                                                                                                                                                                                                                                                                                                                                                                                                                                                                           |
| Complete List of Authors:       | Zhou, Chenghui; Fuwai Hospital State Key Laboratory of Cardiovascular Disease, Anesthesiology<br>Pei, Hanjun; First Affiliated Hospital of Baotou Medical College, Cardiology<br>Gao, Yiming; Fuwai Hospital State Key Laboratory of Cardiovascular Disease, Echocardiology<br>Zhang, Yulin; Chinese Academy of Medical Sciences and Peking Union Medical College Fuwai Hospital<br>Cao, Liang; Fuwai Hospital State Key Laboratory of Cardiovascular Disease, Anesthesiology<br>Fang, Zhongrong; Fuwai Hospital State Key Laboratory of Cardiovascular Disease, Anesthesiology<br>Song, Jiangping; State Key Laboratory of Cardiovascular Disease, Fuwai Hospital, National Center for Cardiovascular Diseases, Chinese Academy of Medical Sciences and Peking Union Medical College |
| <b>Primary Subject Heading</b>: | Cardiovascular medicine                                                                                                                                                                                                                                                                                                                                                                                                                                                                                                                                                                                                                                                                                                                                                               |
| Secondary Subject Heading:      | Diagnostics, Epidemiology, Medical management                                                                                                                                                                                                                                                                                                                                                                                                                                                                                                                                                                                                                                                                                                                                         |
| Keywords:                       | Adult intensive & critical care < ANAESTHETICS, Adult cardiology < CARDIOLOGY, Myocardial infarction < CARDIOLOGY, COVID-19                                                                                                                                                                                                                                                                                                                                                                                                                                                                                                                                                                                                                                                           |
|                                 |                                                                                                                                                                                                                                                                                                                                                                                                                                                                                                                                                                                                                                                                                                                                                                                       |

SCHOLARONE™  
Manuscripts



I, the Submitting Author has the right to grant and does grant on behalf of all authors of the Work (as defined in the below author licence), an exclusive licence and/or a non-exclusive licence for contributions from authors who are: i) UK Crown employees; ii) where BMJ has agreed a CC-BY licence shall apply, and/or iii) in accordance with the terms applicable for US Federal Government officers or employees acting as part of their official duties; on a worldwide, perpetual, irrevocable, royalty-free basis to BMJ Publishing Group Ltd ("BMJ") its licensees and where the relevant Journal is co-owned by BMJ to the co-owners of the Journal, to publish the Work in this journal and any other BMJ products and to exploit all rights, as set out in our [licence](#).

The Submitting Author accepts and understands that any supply made under these terms is made by BMJ to the Submitting Author unless you are acting as an employee on behalf of your employer or a postgraduate student of an affiliated institution which is paying any applicable article publishing charge ("APC") for Open Access articles. Where the Submitting Author wishes to make the Work available on an Open Access basis (and intends to pay the relevant APC), the terms of reuse of such Open Access shall be governed by a Creative Commons licence – details of these licences and which [Creative Commons](#) licence will apply to this Work are set out in our licence referred to above.

Other than as permitted in any relevant BMJ Author's Self Archiving Policies, I confirm this Work has not been accepted for publication elsewhere, is not being considered for publication elsewhere and does not duplicate material already published. I confirm all authors consent to publication of this Work and authorise the granting of this licence.

# Optimal Cutoff Value of Elevated Cardiac Troponin Concentrations for Myocardial Injury Predicts Clinical Outcomes in Adult Patients with COVID-19: A Dose-response Analysis Protocol for Systematic

## Review

Chenghui Zhou<sup>#,\*,1</sup>, M.D, Ph.D; Hanjun Pei<sup>#,2</sup>, M.D,Ph.D; Yiming Gao<sup>3</sup>, M.D,Ph.D; Yulin Zhang<sup>1</sup>, M.D, Ph.D; Liang Cao<sup>1</sup>, M.D; Zhongrong Fang<sup>1</sup>, M.D, Ph.D; Jiangping Song<sup>\*,4</sup>, M.D, Ph.D

<sup>1</sup>Department of Anesthesiology, State Key Laboratory of Cardiovascular Disease, Fuwai Hospital, National Center for Cardiovascular Disease, Chinese Academy of Medical Sciences and Peking Union Medical College, Beijing, 100037, China

<sup>2</sup>Department of Cardiology, The First Affiliated Hospital of Baotou Medical College, Baotou, Inner Mongolia, China

<sup>3</sup>Department of Echocardiography, State Key Laboratory of Cardiovascular Disease, Fuwai Hospital, National Center for Cardiovascular Diseases, Chinese Academy of Medical Sciences & Peking Union Medical College, China

<sup>4</sup>Department of Cardiac Surgery, State Key Laboratory of Cardiovascular Disease, Fuwai Hospital, National Center for Cardiovascular Disease, Chinese Academy of Medical Sciences and Peking Union Medical College, Beijing, 100037, China

<sup>#</sup>Dr. Zhou and Dr. Pei contributed equally as the first authors in this work.

**\*Address for Correspondence:** Chenghui Zhou and Jiangping Song;

No. 167 Beilishi Road, 100037 Xicheng District, Beijing, China

Tel: 86-10-88398082, Fax: 86-10-88398082

E-mail: chenghuizhou@yahoo.com (Zhou Ch); fwsongjiangping@126.com (Song Jp);.

**Word Count:** 3372 words.

## ABSTRACT

**Introduction** Acute myocardial injury in patients with COVID-19 infection has been recognized as one important complication associating with in-hospital mortality. The potential dose response effect of cardiac troponin (cTn) concentrations on adverse clinical outcomes has not been systematically studied. Hence, we will conduct a comprehensive dose-response meta-analysis to quantitatively evaluate the relationship between the elevated cTn concentrations and in-hospital adverse clinical outcomes in COVID-19 patients.

**Methods** We will search PubMed, EMBase, Cochrane Library, and ISI Knowledge via Web of Science database, as well as pre-print databases (medrxiv and biorxiv) (from inception until October, 2021) to identify all retrospective, prospective cohort, and randomized controlled studies using the related keywords. The primary outcome will be all-cause mortality during hospitalization. The second outcome will be major adverse event (MAE). To conduct a dose-response meta-analysis for the potential linear or restricted cubic spline regression relationship between elevated cTn concentrations and all-cause mortality or MAE, studies with three or more categories of cTn concentrations will be included. Univariable or multivariable meta-regression and subgroup analyses will be conducted for the comparison between elevated versus non-elevated categories of cTn concentration. Sensitivity analyses will be used to assess the robustness of our results by removing each included study at one time to obtain and evaluate the remaining overall estimates of all-cause mortality or MAE.

1  
2  
3  
4 **Ethics and dissemination** In accordance with the Institutional Review Board  
5  
6  
7 /Independent Ethics Committee of Fuwai Hospital, the ethical approval is waived for  
8  
9 the protocol of systematic review. This meta-analysis will be disseminated through a  
10  
11  
12 peer-reviewing process for journal publication and conference communication.  
13

14 **Keywords:** Acute myocardial injury, COVID-19, cardiac troponin, dose-response,  
15  
16  
17 meta-analysis  
18

19  
20 **PROSPERO registration number** CRD42020216059  
21  
22  
23  
24  
25  
26  
27  
28  
29  
30  
31  
32  
33  
34  
35  
36  
37  
38  
39  
40  
41  
42  
43  
44  
45  
46  
47  
48  
49  
50  
51  
52  
53  
54  
55  
56  
57  
58  
59  
60

## Strengths and limitations of this study

1. This systematic review and meta-analysis will be the first one to comprehensively explore a potential linear or nonlinear dose-response relationship between elevated cTn concentrations and adverse clinical outcomes in COVID-19.
2. Future data on the prognostic outcomes for different cTn categories (3 or more) in patients with COVID-19 are needed.
3. High sensitive cTn measurements at different time points are suggested for the potential prognostic role of tiny acute myocardial injury (cTn concentrations between detection limit and URL) in patients with COVID-19.
4. The inclusion of both retrospective and prospective studies may result in potential bias.
5. The sample size in each study and the number of included studies may be relative small.

## Introduction

Acute myocardial injury has been recognized as one important complication in adult patients with COVID-19 infection associating with in-hospital morbidity and mortality<sup>1 2</sup>. By Oct 31st 2020, COVID-19 pandemic has cause 46,501,423 infections and 1,202,031 deaths worldwide in 215 countries<sup>3</sup>.

Some studies have showed that the incidence of acute myocardial injury is common as many as 20~40% based on cardiac troponin (cTn) concentrations<sup>4 5</sup>, particularly in patients with obvious cardiovascular risk factors and severity of COVID-19<sup>6 7</sup>.

Although the main target of COVID-19 is the respiratory system, the cardiovascular system could also be influenced by affecting the neurohumoral regulation of the cardiovascular system, unbalancing the myocardial oxygen supply and demand with lung injury induced hypoxia, acute systemic inflammatory reaction, and cytokine storm<sup>8-10</sup>.

Up to now, different diagnostic thresholds of cTn concentrations for acute myocardial injury in COVID-19 patients have been proposed. Some studies did not use 1xURL as the cutoff value of cTn concentrations<sup>11</sup>. Moreover, controversial prognostic relationships of acute myocardial injury have been published by various researchers using 1xURL for acute myocardial injury diagnosis<sup>12 13</sup>. Additionally, COVID-19 is a newly-breakout global pandemic with high mortality (at least 4 times increase), and will have a long-term coexistence with human beings<sup>14</sup>. Accordingly, the optimal cutoff value of cTn concentration for acute myocardial injury with



1  
2  
3  
4 prognostic relevance needs to be identified to trigger a promptly beneficial  
5  
6 intervention\_ in the very near future. However, there have been limited studies  
7  
8 reporting the clinical outcomes for different categories of cTn concentrations in  
9  
10 COVID-19. Hence, we will conduct a comprehensive dose-response meta-analysis to  
11  
12 quantitatively evaluate the association between the elevated cTn concentrations and  
13  
14 adverse clinical outcomes in patients with COVID-19.  
15  
16  
17  
18  
19  
20  
21  
22

### 23 **Objectives**

24  
25 The purpose of this systematic review and meta-analysis is to explore the  
26  
27 potential optimal cutoff value of elevated cardiac troponin concentration for acute  
28  
29 myocardial injury predicting adverse clinical outcomes in adult patients with  
30  
31 COVID-19.  
32  
33  
34  
35  
36  
37  
38

## 39 **METHODS AND ANALYSIS**

### 40 **Search Strategy**

41  
42 We will report this meta-analysis following the Preferred Reporting Items for  
43  
44 Systematic Reviews and Meta-Analyses Protocols (PRISMA-P) guideline<sup>15</sup>. PubMed,  
45  
46 EMBase, Cochrane Library, ISI Knowledge via Web of Science database, as well as  
47  
48 pre-print databases (medrxiv and biorxiv) (from inception until October, 2021) will be  
49  
50 systematically searched. Table 1 shows the related search keywords. Figure 1 shows  
51  
52 the flow chart of searching process. This meta-analysis has been registered in the  
53  
54  
55  
56  
57  
58  
59  
60

1  
2  
3  
4 PROSPERO (CRD42020216059).  
5  
6  
7  
8

9  
10 **Type of Participants**  
11

12 We will include adult patients with confirmed COVID-19 infection as study  
13 participants.  
14  
15  
16

17  
18  
19  
20 **Type of Studies**  
21

22 We will include all the retrospective, prospective cohort, or randomized  
23 controlled studies that have reported the associations of different cTn categories (3 or  
24 more) with the incidence of major adverse clinical outcomes. English-published trials  
25 will be included. The studies unable to extract odds ratio (OR) or hazard ratio (HR)  
26 and the corresponding 95% confidence intervals (CI) will be excluded.  
27  
28  
29  
30  
31  
32  
33  
34  
35  
36  
37  
38

39 **Type of Outcomes**  
40

41 The primary outcome will be all-cause mortality during hospitalization. The  
42 second outcome will be major adverse event (MAE). MAE is a combined endpoint  
43 during hospitalization including: all-cause death, myocardial infarction, congestive  
44 heart failure, acute kidney injury, pulmonary embolism, deep venous thrombosis, or  
45 stroke. Additional outcomes will include the incidence of heart failure, need and  
46 duration for mechanical ventilation, and incidence of multiple organ dysfunction  
47 syndromes.  
48  
49  
50  
51  
52  
53  
54  
55  
56  
57  
58  
59  
60

## Data Extraction

Data will be extracted by two independent authors (Y.Gao and Y.Zhang). A third author (H. Pei) will make a final decision in case of discrepancies. The extracted data will include study design (author, publication year, country, sample size, percentage of positive cTn concentrations), patient characteristics (mean age, male proportion, race, body mass index, diabetes proportion, hypertension proportion, hyperlipidemia proportion, smoking proportion, coronary artery disease proportion, previous myocardial infarction, chronic heart failure, history of atrial fibrillation, history of stroke or transient ischemic accident, acute kidney dysfunction, chronic kidney dysfunction, history of lung disease, history of liver disease, beta-blocker usage, statin usage, angiotensin-converting enzyme inhibitor usage, angiotensin receptor blocker usage, calcium channel blocker usage, aspirin usage), follow-up period, pattern, duration, number of total testing, detection kit of cTn, URL of cTn, detection limit of cTn, cutoff value of cTn, and the different categories for cTn concentration.

## Assessment of Risk of Bias

Newcastle-Ottawa quality assessment scale (NOS) will be used to evaluate the methodological quality of included studies<sup>16</sup>.

## Data synthesis

The ORs or HRs in each study will be extracted from the elevated versus non-elevated categories of cTn concentration for the pooled analysis. For studies only

1  
2  
3  
4 providing the Log-rank test or the Kaplan-Meier survival curve, the HR will be  
5  
6 calculated based on time-to-event aggregate data<sup>17</sup>. The referent category with  
7  
8 nonelevated cTn will be the lowest cTn concentration in each study. Random-effect  
9  
10 model will be used for the potential clinical inconsistency among the included studies  
11  
12 in the pooled analysis by the DerSimonian and Laird method. If one study reported  
13  
14 multiple cTn categories (3 or more), we will calculate the OR based on the number of  
15  
16 cases and non-cases in all of the elevated categories and referent groups for the high  
17  
18 vs low analysis. Univariable or multivariable meta-regression and subgroup analyses  
19  
20 will be conducted for the comparison between elevated versus non-elevated categories  
21  
22 of cTn concentration including study design, demographic characteristics, and  
23  
24 different cTn assay types<sup>18</sup>. Sensitivity analyses will be used to assess the robustness  
25  
26 of our results by removing each included study at one time to obtain and evaluate the  
27  
28 remaining overall estimates of all-cause mortality or MAE. Publication bias  
29  
30 evaluation will be conducted by the Begg's, Egger's test, and visualized symmetry of  
31  
32 the funnel plot. A dose-response meta-analysis for the potential linear or restricted  
33  
34 cubic spline regression relationship between different categorized elevated cTn  
35  
36 concentrations and all-cause mortality or MAE will be performed. For study only  
37  
38 providing the numerical value of each category of elevated cTn concentration, the  
39  
40 related number of times the corresponding URL in each study will be calculated. The  
41  
42 average concentration of elevated cTn in each category will be estimated by the mean  
43  
44 of the lower and upper concentrations. If the highest category has an open upper  
45  
46  
47  
48  
49  
50  
51  
52  
53  
54  
55  
56  
57  
58  
59  
60

1  
2  
3  
4 concentration, the mean concentration will be estimated to be 1.2x the lower  
5  
6 concentrations<sup>19-21</sup>.  $P < 0.05$  (2-sided) will be considered to be statistically  
7  
8 significant. All statistical analyses will be performed in Stata software (version 10.0,  
9  
10 StataCorp., College Station, TX, USA) and RevMan software (version 5.0, Cochrane  
11  
12 StataCorp., College Station, TX, USA) and RevMan software (version 5.0, Cochrane  
13  
14 Collaboration, Oxford, United Kingdom).  
15

## 16 17 **DISCUSSION**

18  
19  
20 Although the Fourth Universal Definition of Myocardial Infarction (UDMI)  
21  
22 defines acute myocardial injury as cTn concentrations >99th percentile URL under a  
23  
24 broad clinical condition<sup>22</sup>, some studies have used thresholds other than the URL<sup>11</sup>,  
25  
26 whereas others using URL have obtained negative findings in patients with  
27  
28 COVID-19<sup>12 13</sup>. Additionally, many studies have not used high sensitive cTn assays  
29  
30 and only measured once at early time point, resulting in the underestimated incidence  
31  
32 and extent of acute myocardial injury in COVID-19.  
33  
34  
35  
36  
37  
38

39  
40 Recently, a meta-analysis has indicated that the COVID-19 patients with acute  
41  
42 myocardial injury (mostly using URL as cutoff) showed a near 4 times higher  
43  
44 mortality risk than those with non-acute myocardial injury<sup>14</sup>. High mortality as high  
45  
46 as 80 times with acute myocardial injury has also been reported in early univariable  
47  
48 regression analysis<sup>1</sup>. Therefore, an optimal cutoff value of cTn concentrations for  
49  
50 acute myocardial injury need to be explored for early risk stratification, prompt  
51  
52 therapy initiation, and thereby improving prognosis<sup>23</sup>. Similar findings by our  
53  
54 previous analysis showed that a lower cutoff value of cTn concentrations for acute  
55  
56  
57  
58  
59  
60

1  
2  
3  
4 myocardial injury than in fourth UDMI has been proposed with prognostic relevance  
5  
6 following elective percutaneous coronary intervention<sup>20</sup>. Fortunately, there has been  
7  
8 several studies concerning this important issue<sup>24-26</sup>. What's more, high sensitive cTn  
9  
10 measurements at different time points<sup>27</sup> are encouraged for the potential prognostic  
11  
12 role of tiny acute myocardial injury (cTn concentrations between detection limit and  
13  
14 URL) in patients with COVID-19 infection<sup>28-31</sup>.

20  
21 The major strength of this systematic review and meta-analysis is, for the first  
22  
23 time, to comprehensively explore a potential linear or nonlinear dose-response  
24  
25 relationship between cTn concentrations and adverse clinical outcomes in COVID-19.  
26  
27 Moreover, the significance of subclinical or tiny acute myocardial injury below URL  
28  
29 level will be focused for early diagnosis to improve prognosis and reduce the related  
30  
31 mortality<sup>28</sup>. In addition, we will try to provide some new evidence for the new  
32  
33 diagnostic criterion of the COVID-19 related acute myocardial injury for a long-term  
34  
35 coexistence of COVID-19 with human beings has been proposed. The limitations, on  
36  
37 the other hand, are also existed in our analysis. Firstly, both the retrospective and  
38  
39 prospective study design will be included resulting the potential bias. Secondly, the  
40  
41 sample size in each study may be small for the limitation of medical resources and  
42  
43 economic decline. Thirdly, we could not rule out the potential influence of different  
44  
45 types of detection kit and method for the cTn concentration in the included studies.  
46  
47 Fourthly, our analysis may not be sufficient for a diagnosis of myocardial infarction  
48  
49 for lacking additional evidence of myocardial ischemia (electrocardiography,  
50  
51  
52  
53  
54  
55  
56  
57  
58  
59  
60

1  
2  
3  
4 echocardiography, coronary CT or angiography) in accordance with the fourth UDMI  
5  
6  
7 definition.

## 12 **ETHICS AND DISSEMINATION**

15 In accordance with the Institutional Review Board /Independent Ethics Committee of  
16  
17 Fuwai Hospital, the ethical approval is waived for the protocol of systematic review.

20 This meta-analysis will be disseminated through a peer-reviewing process for journal  
21  
22  
23 publication and conference communication.

## References

1. Zhou F, Yu T, Du R, et al. Clinical course and risk factors for mortality of adult inpatients with COVID-19 in Wuhan, China: a retrospective cohort study. *Lancet* 2020;395(10229):1054-62.
2. Shi S, Qin M, Shen B, et al. Association of Cardiac Injury With Mortality in Hospitalized Patients With COVID-19 in Wuhan, China. *JAMA Cardiol* 2020;5(7):802-10.
3. Worldometersinfo. COVID-19 coronavirus outbreak. 2020 [Available from: <https://www.worldometers.info/coronavirus/>].2020.
4. Solomon MD, McNulty EJ, Rana JS, et al. The Covid-19 Pandemic and the Incidence of Acute Myocardial Infarction. *N Engl J Med* 2020;383(7):691-3.
5. Lippi G, Lavie CJ, Sanchis-Gomar F. Cardiac troponin I in patients with coronavirus disease 2019 (COVID-19): Evidence from a meta-analysis. *Prog Cardiovasc Dis* 2020;63(3):390-1.
6. Aghagoli G, Gallo Marin B, Soliman LB, et al. Cardiac involvement in COVID-19 patients: Risk factors, predictors, and complications: A review. *J Card Surg* 2020;35(6):1302-5.
7. Mishra AK, Lal A, Sahu KK, et al. Cardiovascular factors predicting poor outcome in COVID-19 patients. *Cardiovasc Pathol* 2020;49:107246.
8. Basso C, Leone O, Rizzo S, et al. Pathological features of COVID-19-associated myocardial injury: a multicentre cardiovascular pathology study. *Eur Heart J* 2020;41(39):3827-35.
9. Mishra AK, Lal A, Sahu KK, et al. Quantifying and reporting cardiac findings in imaging of COVID-19 patients. *Monaldi Arch Chest Dis* 2020;90(4)
10. Tersalvi G, Vicenzi M, Calabretta D, et al. Elevated Troponin in Patients With Coronavirus Disease 2019: Possible Mechanisms. *J Card Fail* 2020;26(6):470-5.
11. He XW, Lai JS, Cheng J, et al. [Impact of complicated myocardial injury on the clinical outcome of severe or critically ill COVID-19 patients]. *Zhonghua Xin Xue Guan Bing Za Zhi* 2020;48(6):456-60.
12. Yang X, Yu Y, Xu J, et al. Clinical course and outcomes of critically ill patients with SARS-CoV-2 pneumonia in Wuhan, China: a single-centered, retrospective, observational study. *Lancet Respir Med* 2020;8(5):475-81.
13. Fu L, Fei J, Xiang H, et al. Influence factors of death risk among COVID-19 patients in Wuhan, China: a hospital-based case-cohort study. *medRxiv* 2020
14. Li JW, Han TW, Woodward M, et al. The impact of 2019 novel coronavirus on heart injury: A Systematic review and Meta-analysis. *Prog Cardiovasc Dis* 2020;63(4):518-24.
15. Shamseer L, Moher D, Clarke M, et al. Preferred reporting items for systematic review and meta-analysis protocols (PRISMA-P) 2015: elaboration and explanation. *BMJ* 2015;350:g7647.
16. Murad MH, Sultan S, Haffar S, et al. Methodological quality and synthesis of case series and case reports. *BMJ Evid Based Med* 2018;23(2):60-3.
17. Williamson PR, Smith CT, Hutton JL, et al. Aggregate data meta-analysis with time-to-event outcomes. *Stat Med* 2002;21(22):3337-51.
18. Higgins JP, Thompson SG. Quantifying heterogeneity in a meta-analysis. *Stat Med* 2002;21(11):1539-58.
19. Berlin JA, Longnecker MP, Greenland S. Meta-analysis of epidemiologic dose-response data. *Epidemiology* 1993;4(3):218-28.
20. Li Y, Pei H, Bulluck H, et al. Periprocedural elevated myocardial biomarkers and clinical outcomes



1  
2  
3 following elective percutaneous coronary intervention: a comprehensive dose-response meta-analysis  
4 of 44,972 patients from 24 prospective studies. *EuroIntervention* 2020;15(16):1444-50.

5  
6 21. Domanski MJ, Mahaffey K, Hasselblad V, et al. Association of myocardial enzyme elevation and  
7 survival following coronary artery bypass graft surgery. *JAMA* 2011;305(6):585-91.

8  
9 22. Thygesen K, Alpert JS, Jaffe AS, et al. Fourth Universal Definition of Myocardial Infarction (2018). *J*  
10 *Am Coll Cardiol* 2018;72(18):2231-64.

11  
12 23. Kozinski M, Krintus M, Kubica J, et al. High-sensitivity cardiac troponin assays: From improved  
13 analytical performance to enhanced risk stratification. *Crit Rev Clin Lab Sci* 2017;54(3):143-72.

14  
15 24. Chen T, Wu D, Chen H, et al. Clinical characteristics of 113 deceased patients with coronavirus  
16 disease 2019: retrospective study. *BMJ* 2020;368:m1091.

17  
18 25. Lala A, Johnson KW, Januzzi JL, et al. Prevalence and Impact of Myocardial Injury in Patients  
19 Hospitalized With COVID-19 Infection. *J Am Coll Cardiol* 2020;76(5):533-46.

20  
21 26. Hui H, Zhang Y, Yang X, et al. Clinical and radiographic features of cardiac injury in patients with  
22 2019 novel coronavirus pneumonia. *medRxiv* 2020. (accessed ).

23  
24 27. Schiavone M, Gasperetti A, Mancone M, et al. Redefining the Prognostic Value of High-Sensitivity  
25 Troponin in COVID-19 Patients: The Importance of Concomitant Coronary Artery Disease. *J Clin Med*  
26 2020;9(10)

27  
28 28. Cho SW. Subclinical and Tiny Myocardial Injury within Upper Reference Limit of Cardiac Troponin  
29 Should Not Be Ignored after Noncardiac Surgery. *Korean Circ J* 2020;50(10):938-9.

30  
31 29. Park J, Hyeon CW, Lee SH, et al. Mildly Elevated Cardiac Troponin below the 99th-Percentile Upper  
32 Reference Limit after Noncardiac Surgery. *Korean Circ J* 2020;50(10):925-37.

33  
34 30. Park J, Hyeon CW, Lee SH, et al. Preoperative cardiac troponin below the 99th-percentile upper  
35 reference limit and 30-day mortality after noncardiac surgery. *Sci Rep* 2020;10(1):17007.

36  
37 31. Mullins KE, Christenson RH. Optimal Detection of Acute Myocardial Injury and Infarction with  
38 Cardiac Troponin: Beyond the 99th Percentile, into the High-Sensitivity Era. *Curr Cardiol Rep*  
39 2020;22(9):101.

1  
2  
3  
4 **Author Contributions** CZ, HP, and JS contributed to the conception and design of  
5  
6 the study, and revision of the protocol. The manuscript of the protocol was drafted by  
7  
8 CZ. YG and YZ will independently search and select the eligible studies and extract  
9  
10 the data from the included studies. LC and ZF will assess methodological quality and  
11  
12 the risk of bias. All the authors approved the protocol publication.  
13  
14  
15  
16  
17  
18  
19

20 **Funding** This work was supported by the CAMS Initiative for Innovative Medicine  
21  
22 (020-I2M-CoV19-003), and the National Natural Science Foundation of China (No.  
23  
24 81970290, and No. 81760096).  
25  
26  
27  
28  
29  
30

31 **Competing interests** None declared.  
32

33 **Patient and public involvement** Patients and/or the public were not involved in  
34  
35 the design, or conduct, or reporting or dissemination plans of this research.  
36  
37  
38

39 **Patient consent for publication** Not required.  
40

41 **Provenance and peer review** Not commissioned; externally peer reviewed.  
42  
43  
44  
45  
46  
47  
48  
49  
50  
51  
52  
53  
54  
55  
56  
57  
58  
59  
60

## Figure Legends

**Figure 1.** Trial Searching and Selecting Flow Chart.

For peer review only

**Table 1 Search strategy for PubMed, EMBase, Cochrane Library, ISI Knowledge via Web of Science, and Medrxiv or Biorxiv****Database****Database****Search items****PubMed**

No.

# 1 ((cardiac injury) OR (myocardial injury)) OR (troponin)

# 2 (COVID-19) OR (SARS-CoV-2)

# 3 # 1 and # 2

**EMBase**

# 1 cardiac AND injury OR (myocardial AND injury) OR troponin

# 2 'covid 19' OR 'sars cov 2'

# 3 # 1 and # 2

**Cochrane Library**

1 # 1 cardiac injury in All Text OR myocardial injury in All Text OR troponin in All Text

2  
3  
4 # 2 COVID-19 in All Text OR SARS-CoV-2 in All Text

5  
6  
7 # 3 # 1 and # 2

8  
9 **ISI Knowledge via**  
10 **Web of Science**

11  
12  
13  
14 # 1 TOPIC: (cardiac injury) OR TOPIC: (myocardial injury) OR TOPIC: (troponin)

15  
16 Timespan: All years. Databases: WOS, BIOSIS, KJD, MEDLINE, RSCI, SCIELO.

17  
18  
19 Search language=Auto

20  
21  
22 # 2 TOPIC: (COVID-19) OR TOPIC: (SARS-CoV-2)

23  
24 Timespan: All years. Databases: WOS, BIOSIS, KJD, MEDLINE, RSCI, SCIELO.

25  
26  
27 Search language=Auto

28  
29  
30 # 3 # 1 and # 2

31  
32  
33 Medrxiv or

34  
35  
36 Biorxiv

37  
38 # 1 title "cardiac injury" (match any words) and abstract or title "myocardial injury"

39  
40

41

42

43

44

45

46

---

1 (match any words) and full text or abstract or title "troponin" (match whole any)  
2

3  
4 # 2 title "COVID-19" (match any words) and abstract or title "SARS-CoV-2" (match any  
5  
6 words)  
7

8  
9 # 3 # 1 and # 2  
10

---

11  
12  
13  
14  
15  
16  
17  
18  
19  
20  
21  
22  
23  
24  
25  
26  
27  
28  
29  
30  
31  
32  
33  
34  
35  
36  
37  
38  
39  
40  
41  
42  
43  
44  
45  
46

For peer review only

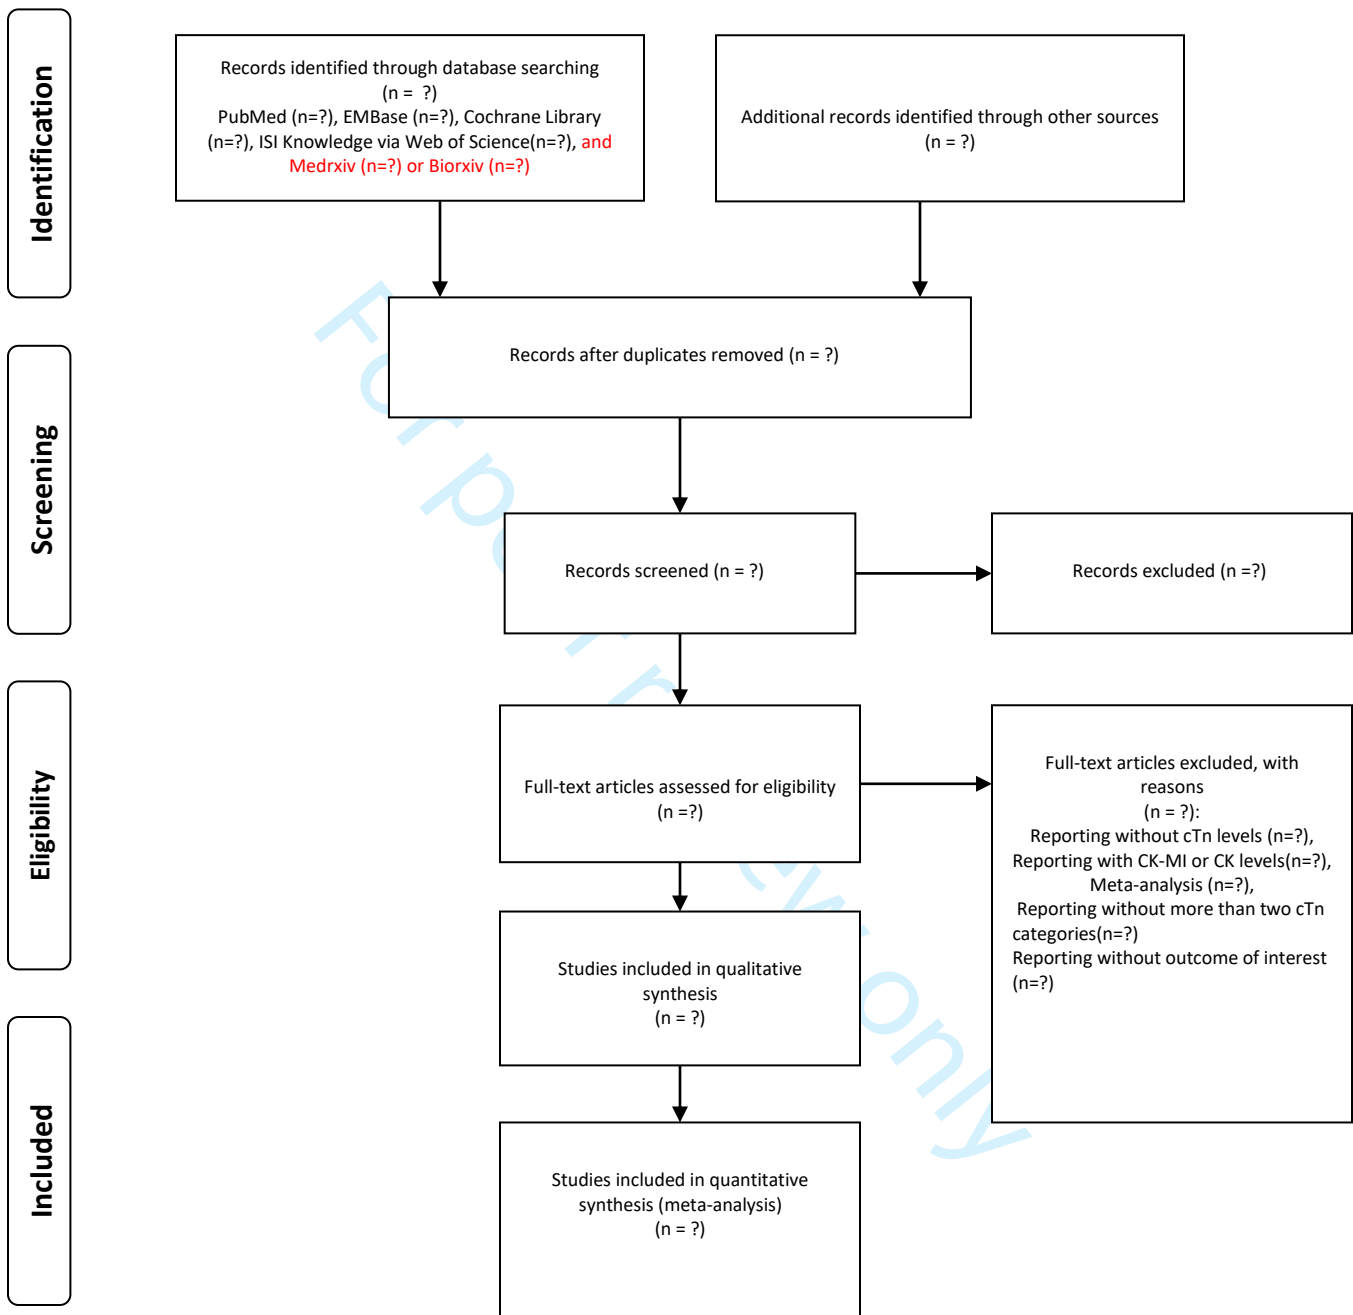

# Reporting checklist for protocol of a systematic review.

Based on the PRISMA-P guidelines.

## Instructions to authors

Complete this checklist by entering the page numbers from your manuscript where readers will find each of the items listed below.

Your article may not currently address all the items on the checklist. Please modify your text to include the missing information. If you are certain that an item does not apply, please write "n/a" and provide a short explanation.

Upload your completed checklist as an extra file when you submit to a journal.

In your methods section, say that you used the PRISMA-Preporting guidelines, and cite them as:

Moher D, Shamseer L, Clarke M, Ghersi D, Liberati A, Petticrew M, Shekelle P, Stewart LA. Preferred Reporting Items for Systematic Review and Meta-Analysis Protocols (PRISMA-P) 2015 statement. Syst Rev. 2015;4(1):1.

|                | Reporting Item                                                                                                                                                | Page Number       |
|----------------|---------------------------------------------------------------------------------------------------------------------------------------------------------------|-------------------|
| Title          |                                                                                                                                                               |                   |
| Identification | <a href="#">#1a</a> Identify the report as a protocol of a systematic review                                                                                  | 1                 |
| Update         | <a href="#">#1b</a> If the protocol is for an update of a previous systematic review, identify as such                                                        | No update         |
| Registration   |                                                                                                                                                               |                   |
|                | <a href="#">#2</a> If registered, provide the name of the registry (such as PROSPERO) and registration number                                                 | 3                 |
| Authors        |                                                                                                                                                               |                   |
| Contact        | <a href="#">#3a</a> Provide name, institutional affiliation, e-mail address of all protocol authors; provide physical mailing address of corresponding author | 1                 |
| Contribution   | <a href="#">#3b</a> Describe contributions of protocol authors and identify the guarantor of the review                                                       | 15                |
| Amendments     |                                                                                                                                                               | Not<br>Amendments |
|                | <a href="#">#4</a> If the protocol represents an amendment of a previously completed or published protocol, identify as                                       |                   |



such and list changes; otherwise, state plan for documenting important protocol amendments

### Support

Sources [#5a](#) Indicate sources of financial or other support for the review 15

Sponsor [#5b](#) Provide name for the review funder and / or sponsor 15

Role of sponsor or funder [#5c](#) Describe roles of funder(s), sponsor(s), and / or institution(s), if any, in developing the protocol 15

### Introduction

Rationale [#6](#) Describe the rationale for the review in the context of what is already known 5

Objectives [#7](#) Provide an explicit statement of the question(s) the review will address with reference to participants, interventions, comparators, and outcomes (PICO) 6

### Methods

Eligibility criteria [#8](#) Specify the study characteristics (such as PICO, study design, setting, time frame) and report characteristics (such as years considered, language, publication status) to be used as criteria for eligibility for the review 6

Information sources [#9](#) Describe all intended information sources (such as electronic databases, contact with study authors, trial registers or other grey literature sources) with planned dates of coverage 6

Search strategy [#10](#) Present draft of search strategy to be used for at least one electronic database, including planned limits, such that it could be repeated 6

Study records - data management [#11a](#) Describe the mechanism(s) that will be used to manage records and data throughout the review 6

Study records - selection process [#11b](#) State the process that will be used for selecting studies (such as two independent reviewers) through each phase of the review (that is, screening, eligibility and inclusion in meta-analysis) 7

Study records - data collection process [#11c](#) Describe planned method of extracting data from reports (such as piloting forms, done independently, in duplicate), any processes for obtaining and confirming data from investigators 7

Data items [#12](#) List and define all variables for which data will be sought (such as PICO items, funding sources), any pre-planned data assumptions and simplifications 7

|    |                     |                      |                                                                                                       |     |
|----|---------------------|----------------------|-------------------------------------------------------------------------------------------------------|-----|
| 1  | Outcomes and        | <a href="#">#13</a>  | List and define all outcomes for which data will be sought, including prioritization of main and      | 7,8 |
| 2  |                     |                      |                                                                                                       |     |
| 3  | prioritization      |                      | additional outcomes, with rationale                                                                   |     |
| 4  |                     |                      |                                                                                                       |     |
| 5  | Risk of bias in     | <a href="#">#14</a>  | Describe anticipated methods for assessing risk of bias of individual studies, including whether this | 8   |
| 6  |                     |                      |                                                                                                       |     |
| 7  | individual studies  |                      | will be done at the outcome or study level, or both; state how this information will be used in data  |     |
| 8  |                     |                      |                                                                                                       |     |
| 9  |                     |                      | synthesis                                                                                             |     |
| 10 |                     |                      |                                                                                                       |     |
| 11 | Data synthesis      | <a href="#">#15a</a> | Describe criteria under which study data will be quantitatively synthesised                           | 8,9 |
| 12 |                     |                      |                                                                                                       |     |
| 13 | Data synthesis      | <a href="#">#15b</a> | If data are appropriate for quantitative synthesis, describe planned summary measures, methods of     | 8,9 |
| 14 |                     |                      | handling data and methods of combining data from studies, including any planned exploration of        |     |
| 15 |                     |                      |                                                                                                       |     |
| 16 |                     |                      | consistency (such as I <sup>2</sup> , Kendall's T)                                                    |     |
| 17 |                     |                      |                                                                                                       |     |
| 18 | Data synthesis      | <a href="#">#15c</a> | Describe any proposed additional analyses (such as sensitivity or subgroup analyses, meta-            | 8,9 |
| 19 |                     |                      | regression)                                                                                           |     |
| 20 |                     |                      |                                                                                                       |     |
| 21 | Data synthesis      | <a href="#">#15d</a> | If quantitative synthesis is not appropriate, describe the type of summary planned                    | 8,9 |
| 22 |                     |                      |                                                                                                       |     |
| 23 |                     |                      |                                                                                                       |     |
| 24 |                     |                      |                                                                                                       |     |
| 25 | Data synthesis      | <a href="#">#15d</a> | If quantitative synthesis is not appropriate, describe the type of summary planned                    | 8,9 |
| 26 |                     |                      |                                                                                                       |     |
| 27 |                     |                      |                                                                                                       |     |
| 28 | Meta-bias(es)       | <a href="#">#16</a>  | Specify any planned assessment of meta-bias(es) (such as publication bias across studies,             | 9   |
| 29 |                     |                      | selective reporting within studies)                                                                   |     |
| 30 |                     |                      |                                                                                                       |     |
| 31 |                     |                      |                                                                                                       |     |
| 32 | Confidence in       | <a href="#">#17</a>  | Describe how the strength of the body of evidence will be assessed (such as GRADE)                    | 9   |
| 33 |                     |                      |                                                                                                       |     |
| 34 | cumulative evidence |                      |                                                                                                       |     |
| 35 |                     |                      |                                                                                                       |     |
| 36 |                     |                      |                                                                                                       |     |

37 None The PRISMA-P checklist is distributed under the terms of the Creative Commons Attribution License CC-BY 4.0. This checklist can be completed  
 38 online using <https://www.goodreports.org/>, a tool made by the [EQUATOR Network](#) in collaboration with [Penelope.ai](#)
